# Supplementary material
Source: Springer Nature journal article supplement (https://www.springermedizin.de/resource/supplementary/12877_2014_1051_MOESM3_ESM.pdf/9440708)

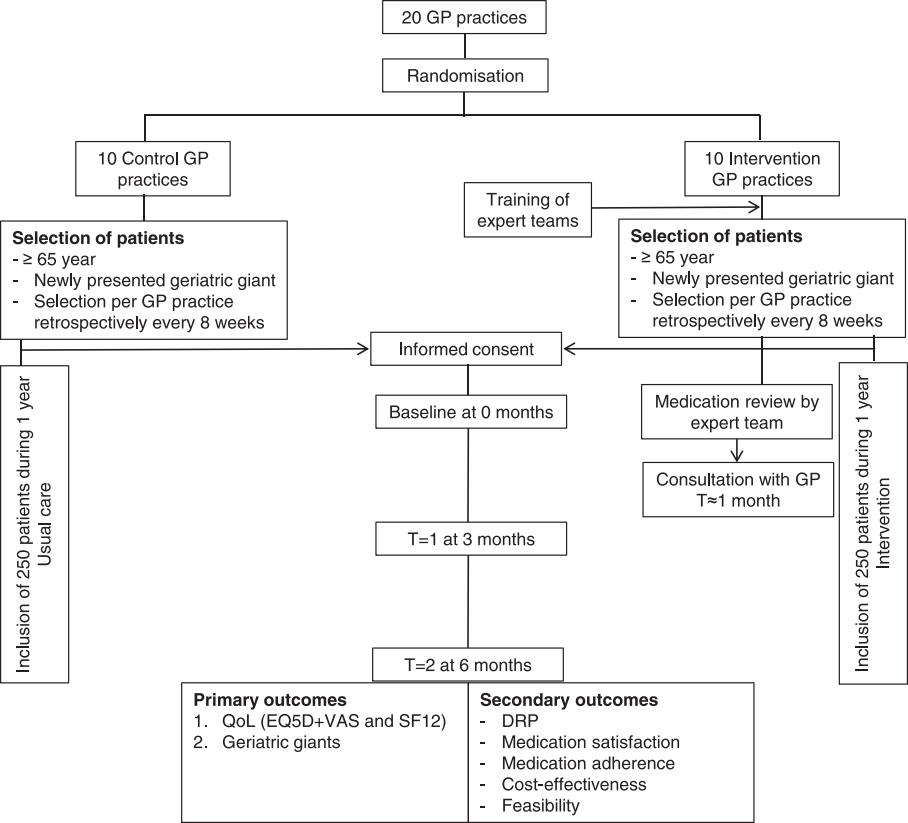

Supplement: MOESM3 [file 9440708]
